# Supplementary material for: Manganese and iron flavonolates as flavonol 2,4-dioxygenase mimics
Source: Royal Society of Chemistry journal article supplement (doi:10.1039/b711864c), 2007-01-01
Supplement: b711864c.pdf [file b711864c.pdf]

**Supplementary material for the paper**

**Manganese and iron flavonolates as flavonol 2,4-dioxygenase mimics**

**József Kaizer, Gábor Baráth, József Pap, Gábor Speier,\* Michel Giorgi, and Marius Réglie**

**Figure 1.** MS spectrum of the *O*-benzoysalicylic acid methylester as a main product of the dioxygenation of  $[\text{Mn}^{\text{II}}(\text{fla})_2(\text{py})_2]$  (**1**) under  $^{16}\text{O}_2$  atmosphere

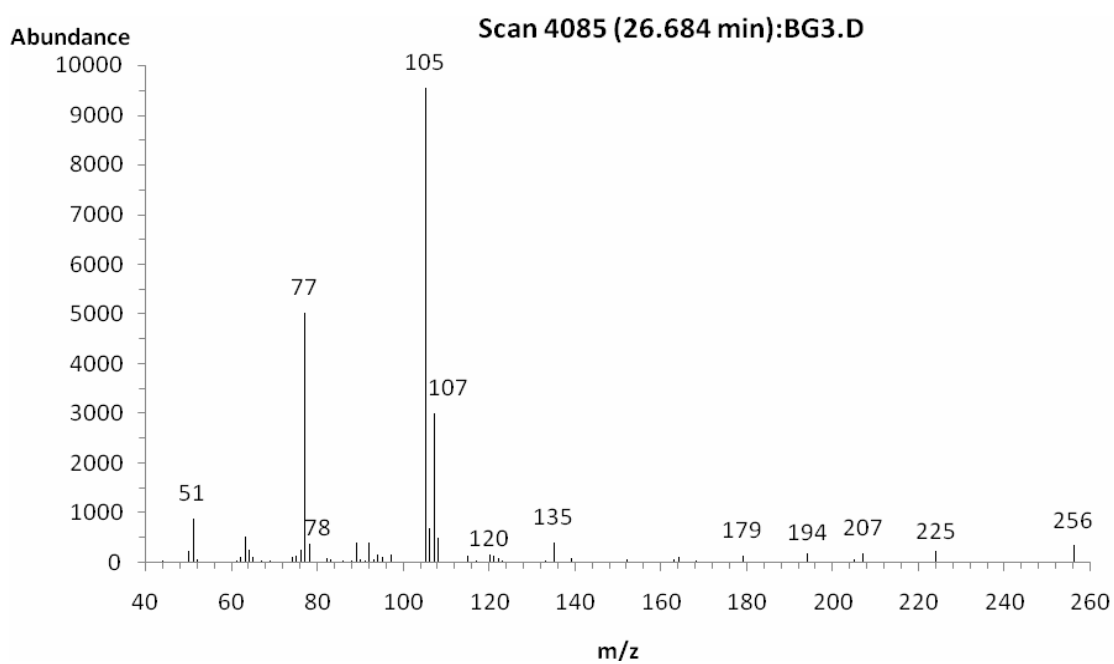

**Figure 2.** MS spectrum of the 4'-methoxy-*O*-benzoysalicylic acid methylester as a main product of the dioxygenation of  $[\text{Fe}^{\text{III}}(4'\text{-MeOfla})_3]$  (**2**) under  $^{16}\text{O}_2$  atmosphere

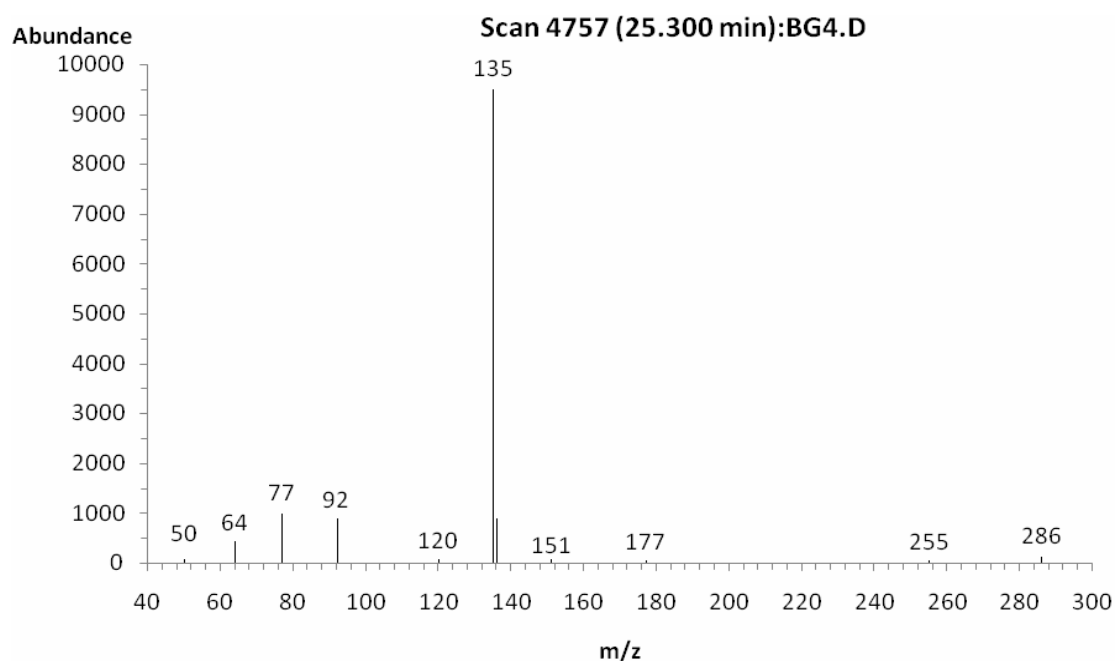

**Figure 3.** MS spectrum of the *O*-benzoysalicylic acid methylester as a main product of the dioxygenation of  $[\text{Mn}^{\text{II}}(\text{fla})_2(\text{py})_2]$  (**1**) under  $^{18}\text{O}_2 : ^{16}\text{O}_2$  (60 : 40%) atmosphere

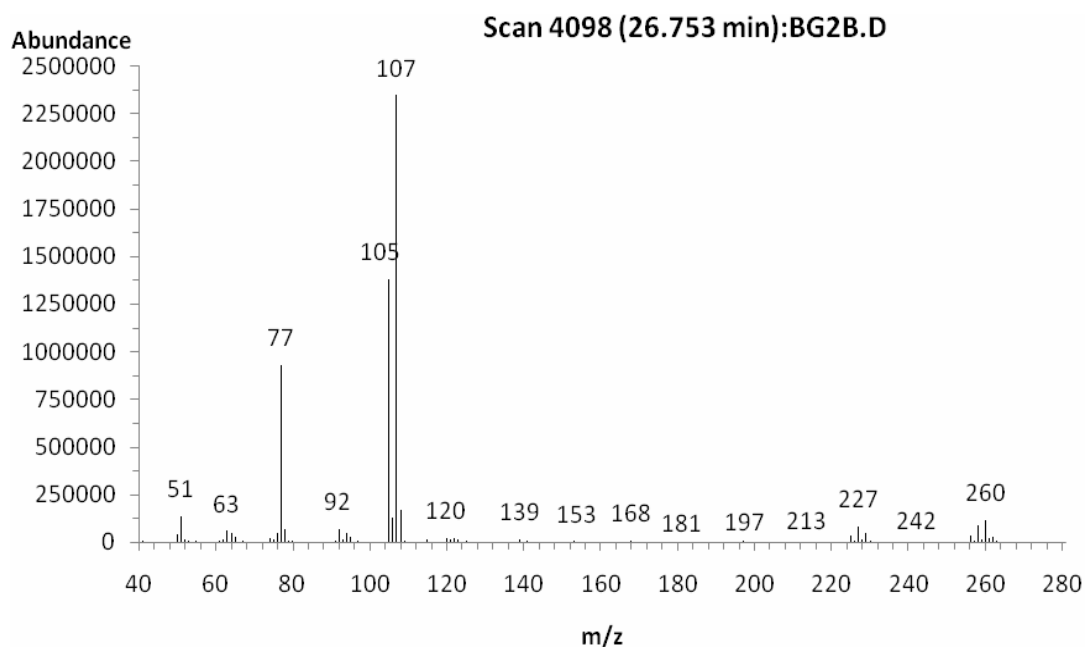

**STable 1.** Kinetic data for the stoichiometric dioxygenation of  $[\text{Mn}^{\text{II}}(\text{fla})_2(\text{py})_2]$  (**1**) in DMF solution

| <b>Expt.<sup>[a]</sup></b> | <b>Temp</b> | <b><math>10^4[\text{1}]^{\text{[a]}}</math></b> | <b><math>10^3[\text{O}_2]</math></b>   | <b><math>10^{-8}\text{-d[1]/dt}</math></b>           | <b><math>k</math></b>                                         |
|----------------------------|-------------|-------------------------------------------------|----------------------------------------|------------------------------------------------------|---------------------------------------------------------------|
| <b>no.</b>                 | <b>(°C)</b> | <b><math>\text{mol dm}^{-3}</math></b>          | <b><math>\text{mol dm}^{-3}</math></b> | <b><math>\text{mol dm}^{-3} \text{s}^{-1}</math></b> | <b><math>\text{s}^{-1} \text{mol}^{-1} \text{dm}^3</math></b> |
| 1                          | 110         | 0.40                                            | 1.69                                   | 1.01                                                 | 0.15±0,007                                                    |
| 2                          | 110         | 0.87                                            | 1.69                                   | 2.14                                                 | 0.15±0,007                                                    |
| 3                          | 110         | 1.50                                            | 1.69                                   | 3.18                                                 | 0.13±0,005                                                    |
| 4                          | 110         | 1.74                                            | 1.69                                   | 3.89                                                 | 0.13±0,006                                                    |
| 5                          | 110         | 1.50                                            | 4.03                                   | 6.01                                                 | 0.10±0,004                                                    |
| 6                          | 110         | 1.50                                            | 8.45                                   | 11.9                                                 | 0.09±0,004                                                    |
| 7                          | 100         | 1.50                                            | 1.64                                   | 1.96                                                 | 0.08±0,003                                                    |
| 8                          | 105         | 1.50                                            | 1.65                                   | 2.36                                                 | 0.09±0,005                                                    |
| 9                          | 115         | 1.50                                            | 1.65                                   | 3.69                                                 | 0.15±0,006                                                    |

<sup>a</sup>In 50 mL of DMF

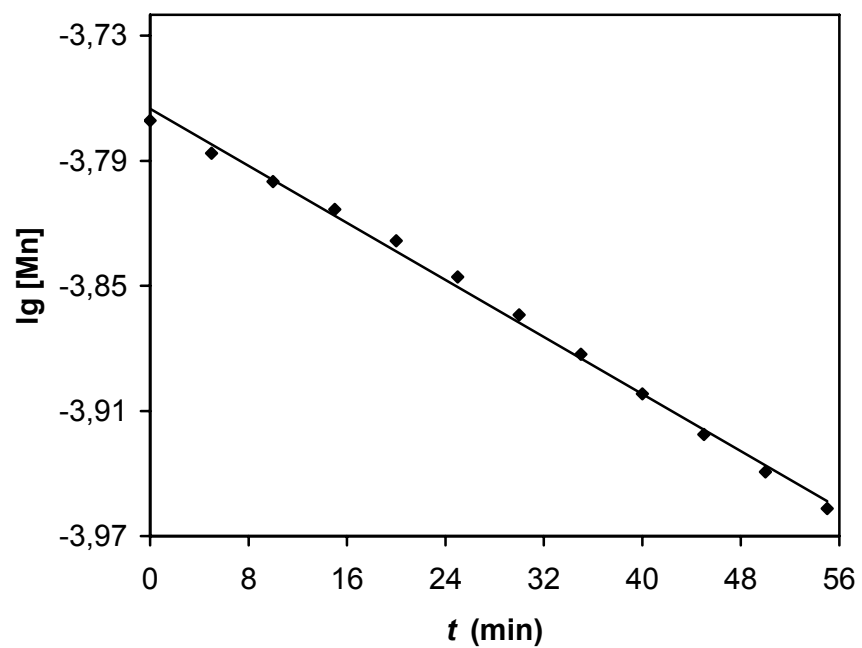

**Figure 4.** Plot of  $\log [\text{Mn}^{\text{II}}(\text{fla})_2(\text{py})_2]$  (**1**) versus time in DMF:  $[\text{Mn}^{\text{II}}(\text{fla})_2(\text{py})_2]_0 = 1.50 \times 10^{-4}$ ;  $[\text{O}_2] = 1.64 \times 10^{-3}$  M; DMF;  $T = 100$  °C

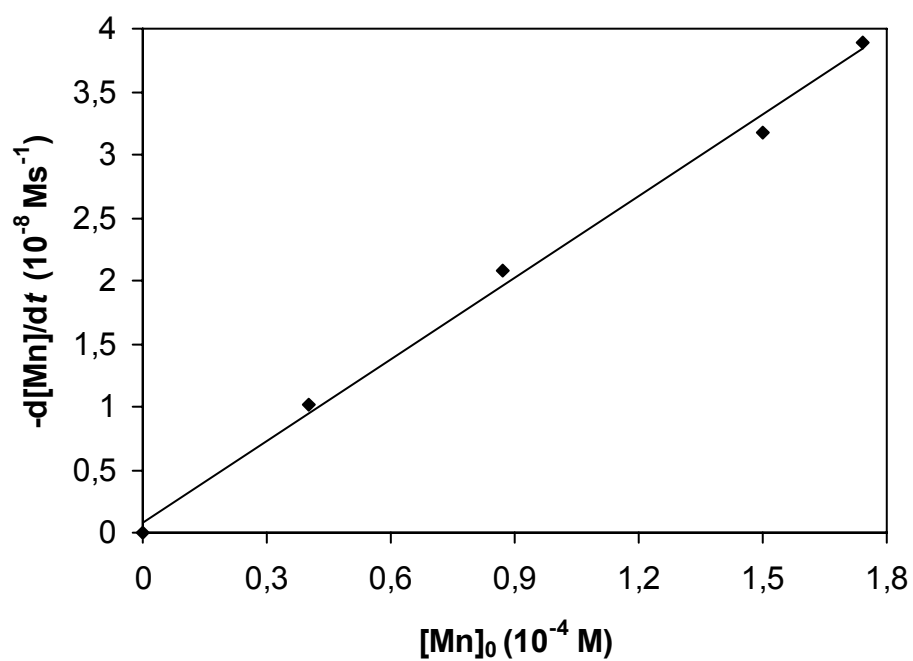

**Figure 5.** Plot of oxygenation rate of  $[Mn^{II}(fla)_2(py)_2]$  (**1**) versus its initial concentration in DMF:  $[O_2] = 1.69 \times 10^{-3} M$ ; DMF;  $T = 110\text{ }^\circ C$

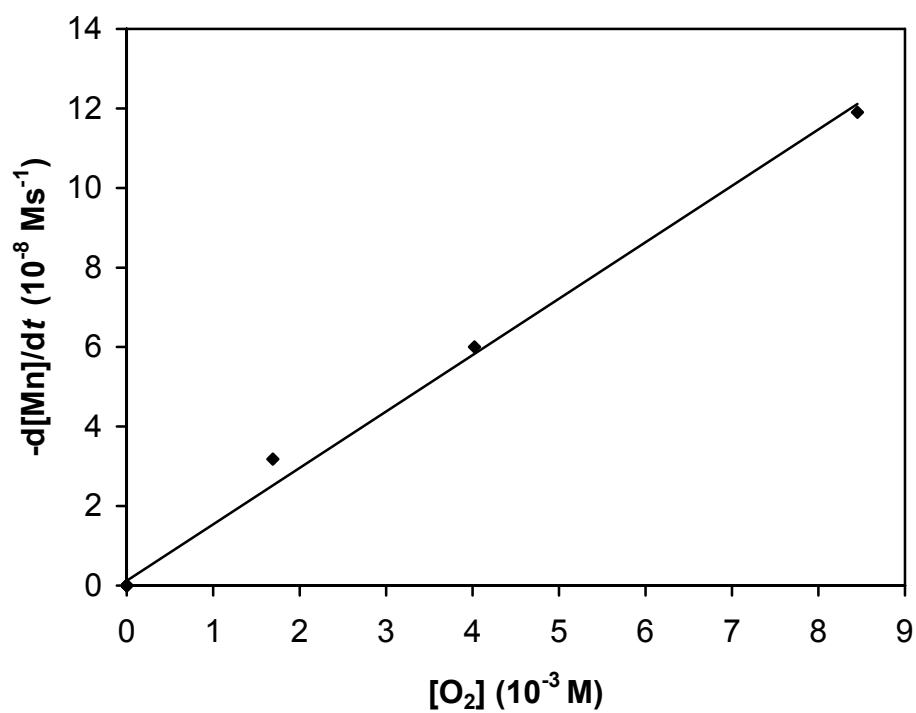

**Figure 6.** Plot of oxygenation rate of  $[Mn^{II}(fla)_2(py)_2]$  (**1**) versus initial concentration of dioxygen in DMF:  $[Mn^{II}(fla)_2(py)_2]_0 = 1.50 \times 10^{-4} M$ , DMF,  $T = 110\text{ }^\circ C$



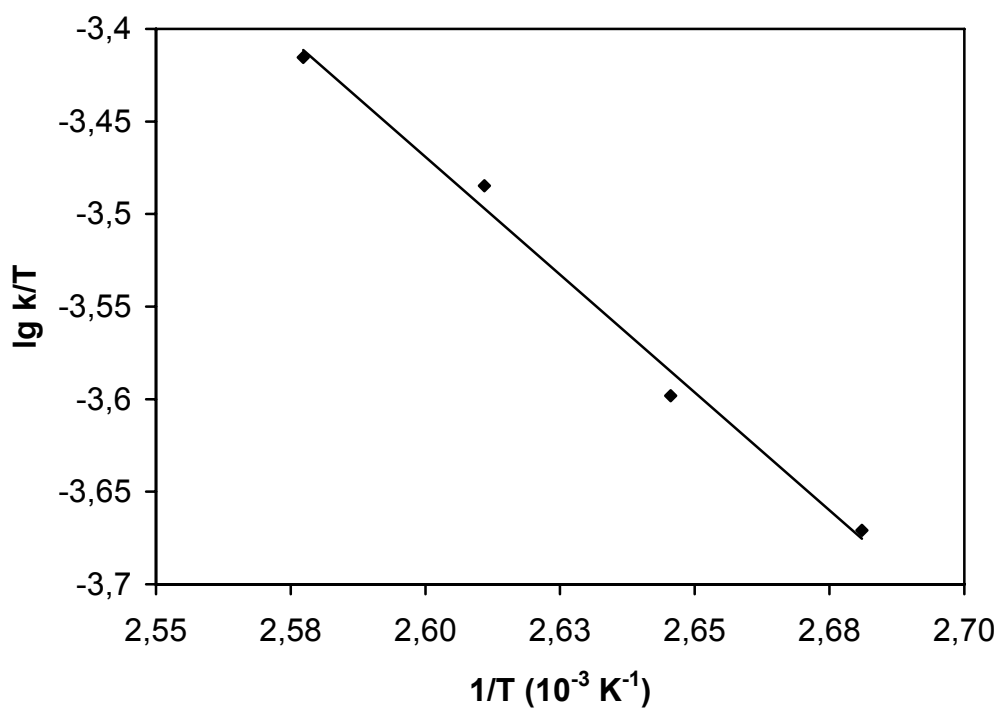

**Figure 7.** Eyring plot for the dioxygenation of  $[\text{Mn}^{\text{II}}(\text{flac})_2(\text{py})_2]$  (**1**):  
 $[\text{Mn}^{\text{II}}(\text{flac})_2(\text{py})_2]_0 = 1.50 \times 10^{-4} \text{ M}$ , DMF

**STable 2.** Kinetic data for the stoichiometric dioxygenation of [Fe<sup>III</sup>(4'-MeOfla)<sub>3</sub>] (**2**) in DMF solution

| <b>Expt.</b> <sup>[a]</sup> | <b>Temp</b> | <b>10<sup>4</sup>[2]<sup>[a]</sup></b> | <b>10<sup>3</sup>[O<sub>2</sub>]</b> | <b>10<sup>-7</sup>-d[2]/dt</b>            | <b><i>k</i></b>                                       |
|-----------------------------|-------------|----------------------------------------|--------------------------------------|-------------------------------------------|-------------------------------------------------------|
| <b>no.</b>                  | <b>(°C)</b> | <b>mol dm<sup>-3</sup></b>             | <b>mol dm<sup>-3</sup></b>           | <b>mol dm<sup>-3</sup> s<sup>-1</sup></b> | <b>s<sup>-1</sup> mol<sup>-1</sup> dm<sup>3</sup></b> |
| 1                           | 90          | 2.2                                    | 1.56                                 | 1.28                                      | 0.37±0.019                                            |
| 2                           | 90          | 1.7                                    | 1.56                                 | 1.05                                      | 0.39±0.018                                            |
| 3                           | 90          | 0.9                                    | 1.56                                 | 0.54                                      | 0.39±0.017                                            |
| 4                           | 90          | 0.7                                    | 1.56                                 | 0.43                                      | 0.39±0.019                                            |
| 5                           | 90          | 2.2                                    | 3.72                                 | 3.33                                      | 0.40±0.021                                            |
| 6                           | 90          | 2.2                                    | 7.44                                 | 6.28                                      | 0.38±0.020                                            |
| 7                           | 80          | 2.2                                    | 1.45                                 | 1.11                                      | 0.25±0.011                                            |
| 8                           | 85          | 2.2                                    | 1.56                                 | 1.23                                      | 0.28±0.013                                            |
| 9                           | 95          | 2.2                                    | 1.61                                 | 1.38                                      | 0.44±0.021                                            |

<sup>a</sup>In 50 mL of DMF

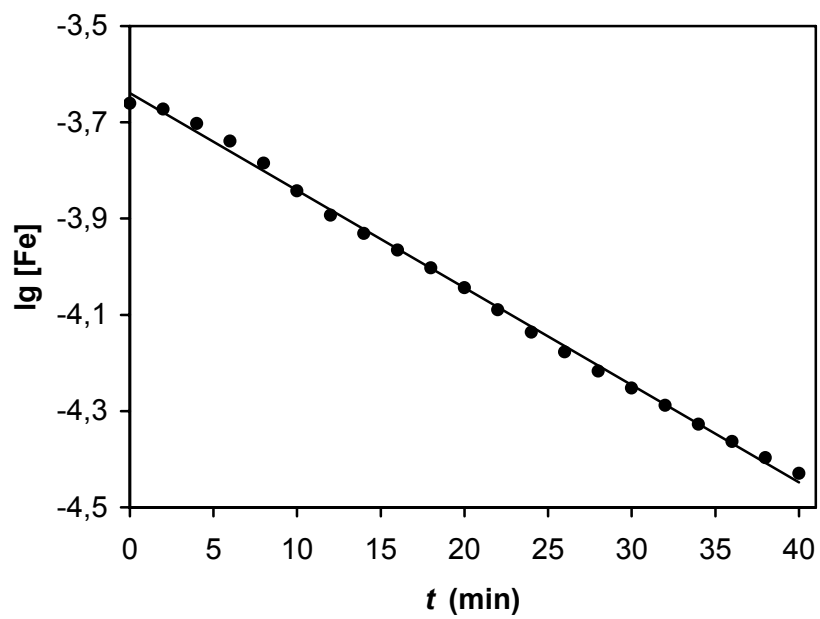

**Figure 8.** Plot of  $\log [\text{Fe}^{\text{III}}(4'\text{-MeOfla})_3]$  (**2**) versus time in DMF:  $[\text{Fe}^{\text{III}}(4'\text{-MeOfla})_3]_0 = 2.20 \times 10^{-4} \text{ M}$ ;  $[\text{O}_2] = 1.56 \times 10^{-3} \text{ M}$ ; DMF;  $T = 90 \text{ }^\circ\text{C}$

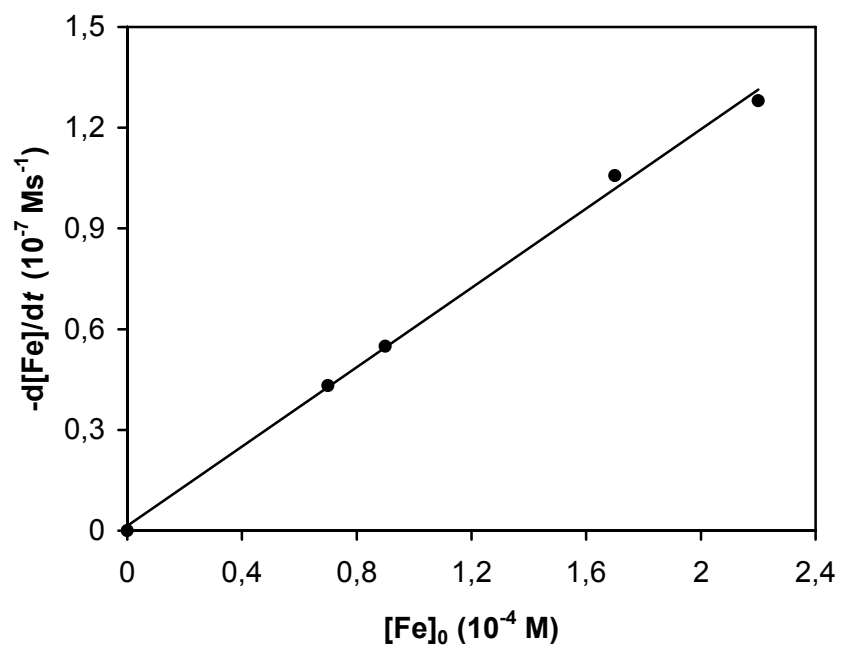

**SFigure 9.** Plot of oxygenation rate of  $[\text{Fe}^{\text{III}}(4'\text{-MeOfla})_3]$  (**2**) versus its initial concentration in DMF:  $[\text{O}_2] = 1.56 \times 10^{-3}$  M; DMF;  $T = 90$  °C

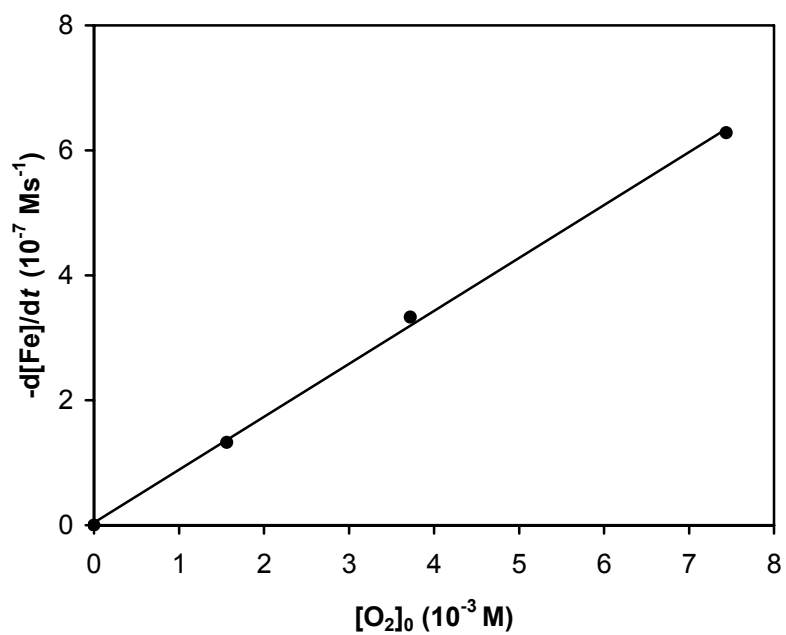

**Figure 10.** Plot of oxygenation rate of  $[Fe^{III}(4'-MeOfla)_3]$  (**2**) versus initial concentration of dioxygen in DMF:  $[Fe^{III}(4'-MeOfla)_3]_0 = 2.20 \times 10^{-4} M$ ; DMF;  $T = 90^\circ C$

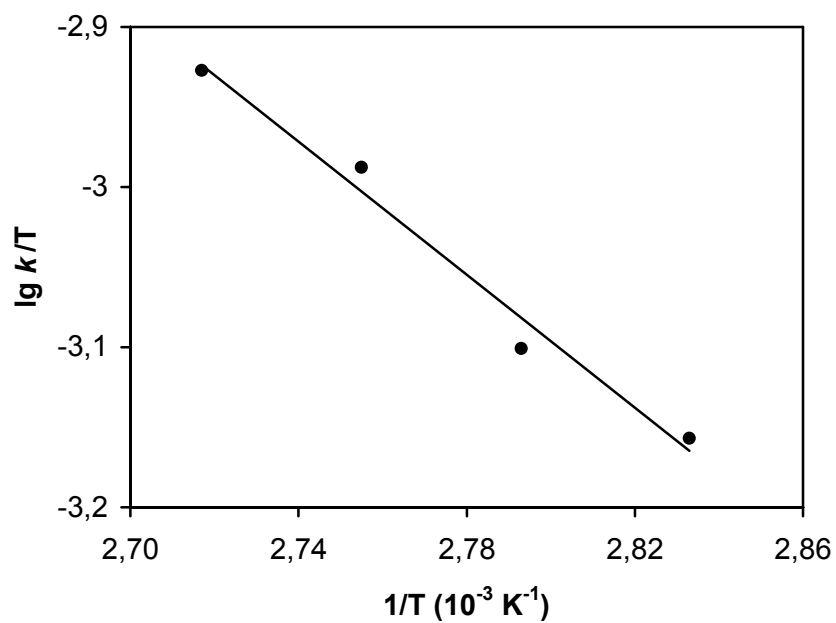

**Figure 11.** Eyring plot for the dioxygenation of  $[\text{Fe}^{\text{III}}(4'\text{-MeOfla})_3]$  (2):  
 $[\text{Fe}^{\text{III}}(4'\text{-MeOfla})_3]_0 = 2.20 \times 10^{-4} \text{ M}$ , DMF
